# Supplementary material for: Alpine hillslope failure in the western US: insights from the Chaos Canyon landslide, Rocky Mountain National Park, USA
Source: Copernicus journal article supplement (doi:10.5194/esurf-11-1251-2023), 2023-12-08
Supplement: Supplementary file 1 [file esurf-11-1251-2023-supplement.zip]

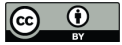

*Supplement of*

**Alpine hillslope failure in the western US: insights from the Chaos Canyon landslide, Rocky Mountain National Park, USA**

**Matthew C. Morriss et al.**

*Correspondence to:* Matthew C. Morriss ([matthew.c.morriss@gmail.com](mailto:matthew.c.morriss@gmail.com)) and Benjamin Lehmann ([benjamin.lehmann@univ-grenoble-alpes.fr](mailto:benjamin.lehmann@univ-grenoble-alpes.fr))

- [esurf-11-1251-2023-supplement-title-page.pdf](#)
- [supplementary\\_material](#)
  - [Insar\\_imager\\_pairs\\_data.csv](#)
  - [Planet\\_imagery.mp4](#)

The copyright of individual parts of the supplement might differ from the article licence.
